# Supplementary material for: The Role of Airborne Particles in the Epidemiology of Clade 2.3.4.4b H5N1 High Pathogenicity Avian Influenza Virus in Commercial Poultry Production Units
Source: MDPI journal article supplement (doi:10.3390/v15041002), 2023-04-19
Supplement: s1 [file s1]

## Supplementary Tables

**Table S1.** IP1 ducks: H5 HPAIV RNA detection and virus isolation from air and environmental samples collected on and around the duck IP

| Sample number | Sample type   | House | Location                                | H5 HPAIV RRT-PCR Ct value* | Volume of air collected (liters) | H5 HPAIV RNA Detected | Virus isolated |
|---------------|---------------|-------|-----------------------------------------|----------------------------|----------------------------------|-----------------------|----------------|
| 1             | Air           | 1     | Inside house 1 (during culling)         | 30.88                      | 104                              | Yes                   | Yes            |
| 2             | Air           | 2     | Inside house 2 (normal operation)       | 29.57                      | 120                              | Yes                   | Yes            |
| 3             | Air           | 1     | North-East outside house 1 (within 1 m) | 29.06                      | 471                              | Yes                   | Yes            |
| 4             | Air           | 1     | North outside house 1 (within 1 m)      | 33.00                      | 330                              | Yes                   | No             |
| 5             | Air           | 2     | North-East outside house 2 (within 1 m) | 34.45                      | 590                              | Yes                   | No             |
| 6             | Air           | 2     | North outside house 2 (within 1 m)      | No Ct                      | 522                              | No                    | No             |
| 7             | Air           | N/A   | 10m North-East (downwind)               | 32.67                      | 515                              | Yes                   | No             |
| 8             | Air           | N/A   | 120m North North-East (downwind)        | No Ct                      | 494                              | No                    | No             |
| 9             | Vent dust     | 1     | North-West side of house 1              | 28.27                      | N/A                              | Yes                   | No             |
| 10            | Vent dust     | 1     | North-East side of house 1              | 30.05                      | N/A                              | Yes                   | ND             |
| 11            | Vent dust     | 1     | East side of house 1                    | 32.48                      | N/A                              | Yes                   | ND             |
| 12            | Vent dust     | 1     | South-East side of house 1              | 30.57                      | N/A                              | Yes                   | No             |
| 13            | Vent dust     | 1     | South-West side of house 1              | 31.42                      | N/A                              | Yes                   | ND             |
| 14            | Vent dust     | 1     | West side of house 1                    | 31.40                      | N/A                              | Yes                   | No             |
| 15            | Vent dust     | 2     | North-West side of house 2              | 31.15                      | N/A                              | Yes                   | No             |
| 16            | Vent dust     | 2     | North-East side of house 2              | 32.53                      | N/A                              | Yes                   | ND             |
| 17            | Vent dust     | 2     | East side of house 2                    | 33.53                      | N/A                              | Yes                   | ND             |
| 18            | Vent dust     | 2     | South-East side of house 2              | 26.39                      | N/A                              | Yes                   | Yes            |
| 19            | Vent dust     | 2     | South-West side of house 2              | 27.18                      | N/A                              | Yes                   | No             |
| 20            | Vent dust     | 2     | West side of house 2                    | No Ct                      | N/A                              | No                    | ND             |
| 21            | Ground water  | 1     | South entrance to house 1               | No Ct                      | N/A                              | No                    | ND             |
| 22            | Ground water  | 2     | South entrance to house 2               | No Ct                      | N/A                              | No                    | ND             |
| 23            | Duck feathers | 2     | East outside house 2                    | 33.59                      | N/A                              | Yes                   | No             |
| 24            | Wet straw     | 2     | North-East side of house 2              | No Ct                      | N/A                              | No                    | ND             |
| 25            | Wet straw     | 2     | East side of house 2                    | No Ct                      | N/A                              | No                    | ND             |
| 26            | OP swab       | 2     | Inside house 2                          | 13.23                      | N/A                              | Yes                   | Yes            |

\* Ct values derived from the H5 HPAIV RRT-PCR as previously described (72); samples with Ct values  $\geq 36$  were considered negative; lower Ct values indicate higher levels of H5 HPAIV RNA; N/A = not applicable; ND = virus isolation not performed.

**Table S2.** IP2 turkeys: H5 HPAIV RNA detection and virus isolation from air and environmental samples collected on and around the IP

| Sample number | Sample Type | house | Location                                     | H5 HPAIV RRT-PCR Ct value* | Volume of air collected (liters) | H5 HPAIV RNA detected | Virus isolated |
|---------------|-------------|-------|----------------------------------------------|----------------------------|----------------------------------|-----------------------|----------------|
| 1             | Air         | 2     | Inside                                       | 32.91                      | 338                              | Yes                   | No             |
| 2             | Air         | 3     | Inside                                       | 33.11                      | 372                              | Yes                   | Yes            |
| 3             | Air         | 1     | Outside North-East within 1m                 | No Cq                      | 484                              | No                    | ND             |
| 4             | Air         | 3     | Outside North-East within 1m                 | No Cq                      | 461                              | No                    | ND             |
| 5             | Air         | 3     | Outside East-Northeast under extract         | 35.55                      | 431                              | Yes                   | No             |
| 6             | Air         | N/A   | 50m North-East of houses                     | No Cq                      | 568                              | No                    | ND             |
| 7             | Air         | N/A   | 50m North-East of carcass loading area       | No Cq                      | 542                              | No                    | ND             |
| 8             | Air         | N/A   | 120m North-East of houses                    | No Cq                      | 588                              | No                    | ND             |
| 9             | Feather     | N/A   | 60m North-East of carcass loading area       | 35.11                      | N/A                              | Yes                   | No             |
| 10            | Feather     | N/A   | 65m North-East of carcass loading area       | 30.63                      | N/A                              | Yes                   | No             |
| 11            | Feather     | N/A   | 60m North-North-East of carcass loading area | No Cq                      | N/A                              | No                    | ND             |
| 12            | Feather     | N/A   | 65m North-North-East of carcass loading area | No Cq                      | N/A                              | No                    | ND             |
| 13            | Feather     | N/A   | 80m North-East of carcass loading area       | 30.06                      | N/A                              | Yes                   | No             |
| 14            | Feather     | N/A   | 100m North-East of carcass loading area      | No Cq                      | N/A                              | No                    | ND             |
| 15            | Feather     | N/A   | 120m North-East of carcass loading area      | No Cq                      | N/A                              | No                    | ND             |
| 16            | Feather     | N/A   | 150m North-East of carcass loading area      | No Cq                      | N/A                              | No                    | ND             |
| 17            | Feather     | N/A   | 160m North-East of carcass loading area      | No Cq                      | N/A                              | No                    | ND             |
| 18            | Feather     | N/A   | 180m North-East of carcass loading area      | No Cq                      | N/A                              | No                    | ND             |

|    |         |     |                                         |       |     |     |     |
|----|---------|-----|-----------------------------------------|-------|-----|-----|-----|
| 19 | Feather | N/A | 180m North-East of carcass loading area | No Cq | N/A | No  | ND  |
| 20 | Feather | N/A | 180m North-East of carcass loading area | No Cq | N/A | No  | ND  |
| 21 | Dust    | 1   | Inside                                  | 33.39 | N/A | Yes | No  |
| 22 | Dust    | 1   | Outside East                            | 36.54 | N/A | No  | ND  |
| 23 | Dust    | 1   | outside North-East                      | 35.75 | N/A | Yes | No  |
| 24 | Dust    | 1   | Inside                                  | 34.76 | N/A | Yes | ND  |
| 25 | Dust    | 2   | Outside East                            | 34.81 | N/A | Yes | No  |
| 26 | Dust    | 2   | Outside East-Northeast                  | No Cq | N/A | No  | ND  |
| 27 | Dust    | 2   | Inside North-West                       | 27.96 | N/A | Yes | No  |
| 28 | Dust    | 2   | Inside                                  | 36.62 | N/A | No  | ND  |
| 29 | Dust    | 2   | Outside South-East                      | 36.07 | N/A | No  | ND  |
| 30 | Dust    | 3   | Outside East                            | No Cq | N/A | No  | ND  |
| 31 | Dust    | 3   | Outside East-Northeast                  | 33.28 | N/A | Yes | No  |
| 32 | Dust    | 3   | Inside extract North-West               | 28.72 | N/A | Yes | No  |
| 33 | Dust    | 3   | Inside                                  | 34.2  | N/A | Yes | No  |
| 34 | Dust    | 3   | Outside South-East                      | 34.7  | N/A | Yes | ND  |
| 35 | Water   | 1   | Outside East                            | No Cq | N/A | No  | ND  |
| 36 | Water   | 3   | Outside South-Southeast                 | 38.72 | N/A | No  | ND  |
| 37 | Water   | 3   | East-Northeast                          | 37.21 | N/A | No  | ND  |
| 38 | Water   | N/A | Middle of IP                            | 38.92 | N/A | No  | ND  |
| 39 | Water   | 3   | Inside                                  | 31.68 | N/A | Yes | ND  |
| 40 | Water   | 3   | Outside East                            | 34.91 | N/A | Yes | No  |
| 41 | Op swab | 2   | Inside                                  | 26.85 | N/A | Yes | Yes |
| 42 | Op swab | 3   | Inside                                  | 25.27 | N/A | Yes | Yes |

\* Ct values derived from the H5 HPAIV RRT-PCR as previously described (48); samples with Ct values  $\geq 36$  were considered negative; lower Ct values indicate higher levels of H5 HPAIV RNA; N/A = not applicable; ND = virus isolation not performed.

Page Break

**Table S3.** IP3 chickens: H5 HPAIV RNA detection and virus isolation from air and environmental samples collected on and around the IP

| Sample number | Sample Type | House | Location | H5 HPAIV RRT-PCR Ct value* | Volume of air collected (liters) | Interpretation | Virus isolated |
|---------------|-------------|-------|----------|----------------------------|----------------------------------|----------------|----------------|
| 1             | Air         | 1     | Inside   | 38.07                      | 195                              | No             | No             |
| 2             | Air         | 5     | Inside   | 35.46                      | 187                              | Yes            | No             |

|    |         |   |                               |       |     |     |    |
|----|---------|---|-------------------------------|-------|-----|-----|----|
| 3  | Air     | 1 | Outside North-East roof       | No Cq | 323 | No  | No |
| 4  | Air     | 5 | Outside North-East roof       | 37.24 | 192 | No  | No |
| 5  | Air     | 5 | Outside North-East vent       | 38.11 | 165 | No  | No |
| 6  | Air     | 5 | Outside North-East within 5m  | 38.34 | 568 | No  | No |
| 7  | Air     | 5 | Outside North-East within 25m | No Cq | 830 | No  | No |
| 8  | Air     | 5 | Outside North-East within 70m | No Cq | 765 | No  | No |
| 9  | Feather | 1 | Inside                        | No Cq | N/A | No  | ND |
| 10 | Feather | 5 | Inside                        | 31.35 | N/A | Yes | No |
| 11 | Feather | 1 | Outside 10m North-East        | No Cq | N/A | No  | ND |
| 12 | Feather | 5 | Outside 10m West              | 28.86 | N/A | Yes | No |
| 13 | Feather | 5 | Outside 5m West               | 39.42 | N/A | No  | No |
| 14 | Feather | 5 | Outside 50m North-East        | 39.7  | N/A | No  | ND |
| 15 | Feather | 5 | Outside 60m North-East        | No Cq | N/A | No  | ND |
| 16 | Dust    | 1 | Outside vent South-East       | No Cq | N/A | No  | ND |
| 17 | Dust    | 1 | Outside vent South            | No Cq | N/A | No  | ND |
| 18 | Dust    | 1 | Outside vent South-West       | 38.67 | N/A | No  | ND |
| 19 | Dust    | 1 | Outside vent West             | No Cq | N/A | No  | ND |
| 20 | Dust    | 1 | Outside vent West             | No Cq | N/A | No  | ND |
| 21 | Dust    | 1 | Outside vent North-West       | No Cq | N/A | No  | ND |
| 22 | Dust    | 1 | Outside vent North            | No Cq | N/A | No  | ND |
| 23 | Dust    | 1 | Outside vent North-East       | No Cq | N/A | No  | ND |
| 24 | Dust    | 1 | Outside vent East             | No Cq | N/A | No  | ND |
| 25 | Dust    | 5 | Outside vent South-East       | No Cq | N/A | No  | ND |
| 26 | Dust    | 5 | Outside vent South            | No Cq | N/A | No  | ND |

|    |             |   |                         |       |     |     |     |
|----|-------------|---|-------------------------|-------|-----|-----|-----|
| 27 | Dust        | 5 | Outside vent South-West | 32.61 | N/A | Yes | No  |
| 28 | Dust        | 5 | Outside vent West       | No Cq | N/A | No  | ND  |
| 29 | Dust        | 5 | Outside vent West       | No Cq | N/A | No  | ND  |
| 30 | Dust        | 5 | Outside vent West       | No Cq | N/A | No  | ND  |
| 31 | Dust        | 5 | Outside vent North-West | No Cq | N/A | No  | ND  |
| 32 | Dust        | 5 | Outside vent North      | 37.38 | N/A | No  | No  |
| 33 | Dust        | 5 | Outside vent North-East | No Cq | N/A | No  | ND  |
| 34 | Dust        | 1 | Inside vent South-East  | No Cq | N/A | No  | ND  |
| 35 | Dust        | 1 | Inside vent South       | No Cq | N/A | No  | ND  |
| 36 | Dust        | 1 | Inside vent South-West  | No Cq | N/A | No  | ND  |
| 37 | Dust        | 1 | Inside vent Centre      | 39.86 | N/A | No  | ND  |
| 38 | Dust        | 5 | Inside vent South-East  | No Cq | N/A | No  | ND  |
| 39 | Dust        | 5 | Inside vent South       | 39.08 | N/A | No  | ND  |
| 40 | Dust        | 5 | Inside vent South       | No Cq | N/A | No  | ND  |
| 41 | Dust        | 5 | Inside vent East        | No Cq | N/A | No  | ND  |
| 42 | Dust        | 5 | Inside vent Centre      | No Cq | N/A | No  | ND  |
| 43 | Water       | 1 | Inside                  | No Cq | N/A | No  | ND  |
| 44 | Water       | 5 | Inside                  | 34.14 | N/A | Yes | No  |
| 45 | Bird faeces | 5 | Outside 50m North-East  | No Cq | N/A | No  | ND  |
| 46 | Op swab     | 1 | Inside                  | No Cq | N/A | No  | ND  |
| 47 | Cl swab     | 1 | Inside                  | No Cq | N/A | No  | ND  |
| 48 | Op swab     | 5 | Inside                  | 24.48 | N/A | Yes | Yes |
| 49 | Cl swab     | 5 | Inside                  | 28.06 | N/A | Yes | ND  |

\* Ct values derived from the H5 HPAIV RRT-PCR as previously described (49); samples with Ct values  $\geq 36$  were considered negative; lower Ct values indicate higher levels of H5 HPAIV RNA; N/A = not applicable; ND = virus isolation not performed.
